# Supplementary material for: Penile-Sparing Surgery for Tumour Recurrence after Previous Glansectomy/Partial Penectomy: Treatment Feasibility and Oncological Outcomes
Source: MDPI journal article supplement (doi:10.3390/cancers15194807), 2023-09-29
Supplement: s1 [file s1]

A

Local recurrence Survival

Local recurrence — Sparing surgery — Penectomy

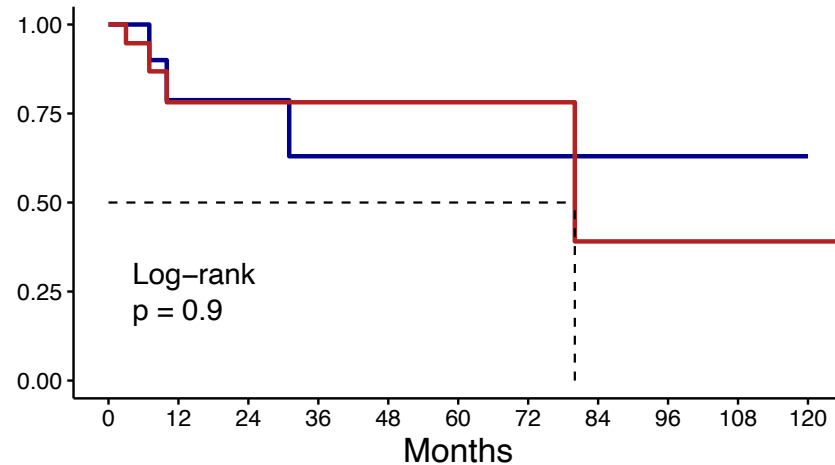

Local recurrence

Number at risk

|                 |    |    |    |    |    |    |    |    |    |     |     |
|-----------------|----|----|----|----|----|----|----|----|----|-----|-----|
| Sparing surgery | 13 | 6  | 6  | 4  | 4  | 3  | 2  | 2  | 2  | 2   | 1   |
| Penectomy       | 22 | 8  | 5  | 4  | 3  | 2  | 2  | 1  | 1  | 1   | 1   |
|                 | 0  | 12 | 24 | 36 | 48 | 60 | 72 | 84 | 96 | 108 | 120 |

B

Overall recurrence Survival

Overall recurrence — Sparing surgery — Penectomy

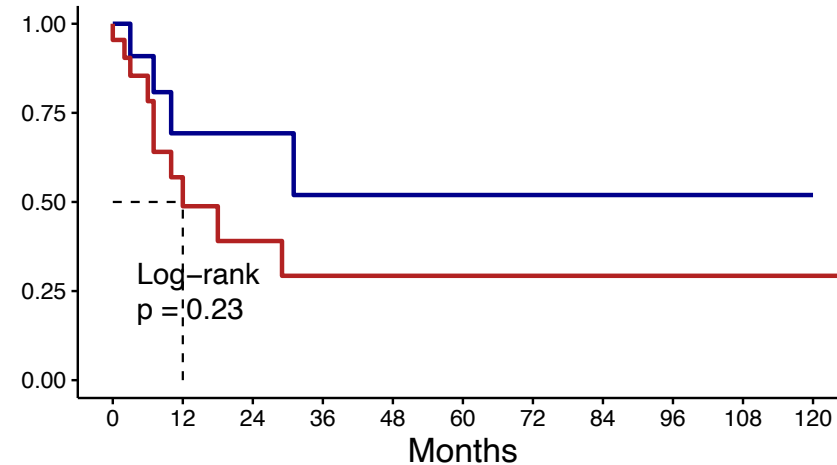

Overall recurrence

Number at risk

|                 |    |    |    |    |    |    |    |    |    |     |     |
|-----------------|----|----|----|----|----|----|----|----|----|-----|-----|
| Sparing surgery | 13 | 5  | 5  | 3  | 3  | 2  | 1  | 1  | 1  | 1   | 1   |
| Penectomy       | 22 | 7  | 4  | 2  | 1  | 1  | 1  | 1  | 1  | 1   | 1   |
|                 | 0  | 12 | 24 | 36 | 48 | 60 | 72 | 84 | 96 | 108 | 120 |
